# Supplementary material for: Medicinal plants used among pregnant women in a tertiary teaching hospital in Jimma, Ethiopia: a cross-sectional study
Source: PubMed Central journal article supplement — BMJ Open. 2021 Aug 23;11(8):e046495. doi: 10.1136/bmjopen-2020-046495 (PMC8386214; doi:10.1136/bmjopen-2020-046495), 2021-08-23
Supplement: bmjopen-2020-046495supp002.pdf [file bmjopen-2020-046495supp002.pdf]

**Additional table 2: Data extraction form for patient medical record review**

Basic admission details and patient characteristics:

- Study Id ; Admission ward: Maternity/labour ; Gynaecology
- Age ; Weight ; Height
- Admission date  Discharge date  Duration of hospitalization
- Gestational age (in weeks)
- Gravidity: ; Parity
- Type of patient: Antenatal  Postnatal
- Type of delivery: Vaginal delivery  Cesarean delivery
- Breast feeding :Yes  No
- Known drug allergies: Yes  No ; Type of drug allergy

Details of admission (including vital signs):  
Pregnancy outcomes and other obstetrics data (live birth, stillbirth, twin birth, postpartum haemorrhage, congenital abnormalities/birth defects, hypertension/eclampsia/HELLP, diabetes, placental abruption, etc.):  
Any other maternal and perinatal outcomes:  
Relevant laboratory results and investigations (Renal function test, Liver function test, Complete Blood Count (CBC), Echocardiography, Lipid Profile, Cardiac function, Electrolyte test, Glycaemic level, etc.):  

Data collector: Name \_\_\_\_\_ Signature \_\_\_\_\_

| Page
