# Supplementary material for: Medicinal plants used among pregnant women in a tertiary teaching hospital in Jimma, Ethiopia: a cross-sectional study
Source: PubMed Central journal article supplement — BMJ Open. 2021 Aug 23;11(8):e046495. doi: 10.1136/bmjopen-2020-046495 (PMC8386214; doi:10.1136/bmjopen-2020-046495), 2021-08-23
Supplement: bmjopen-2020-046495supp003.pdf [file bmjopen-2020-046495supp003.pdf]

**Supplementary table 3:** Definitions of safety categories of medicinal plants used during pregnancy at JUMC, Ethiopia

| <b>Classification</b>                   | <b>Description</b>                                                                                                                           |
|-----------------------------------------|----------------------------------------------------------------------------------------------------------------------------------------------|
| Safe to use in pregnancy                | Available human evidence suggests the medicinal plant can be safely used in pregnancy                                                        |
| Use with Caution                        | Available human evidence for the medicinal plant is limited so it should not be used without consulting a qualified health care practitioner |
| Potentially harmful to use in pregnancy | Available evidence has shown adverse impacts on pregnancy or fetus following the use of the medicinal plant                                  |
| Information unavailable                 | No reference was found regarding use of the medicinal plant in pregnancy                                                                     |

Source [adapted from]: Kennedy DA, Lupattelli A, Koren G, Nordeng H. Safety classification of herbal medicines used in pregnancy in a multinational study. *BMC Complement Altern Med.* 2016; 16: 102.
