# Supplementary material for: Medicinal plants used among pregnant women in a tertiary teaching hospital in Jimma, Ethiopia: a cross-sectional study
Source: PubMed Central journal article supplement — BMJ Open. 2021 Aug 23;11(8):e046495. doi: 10.1136/bmjopen-2020-046495 (PMC8386214; doi:10.1136/bmjopen-2020-046495), 2021-08-23
Supplement: bmjopen-2020-046495supp004.pdf [file bmjopen-2020-046495supp004.pdf]

**Supplementary table 4:** Overview of medicinal plants used during pregnancy according to safety classification and number of users at JUMC, Ethiopia

| Type of medicinal plant used                                  | Safety class* | Number of users (N=319) | Percentage <sup>#</sup> |
|---------------------------------------------------------------|---------------|-------------------------|-------------------------|
| <i>Linum usitatissimum</i> L. (Telba)                         | Caution       | 246                     | 77.1                    |
| <i>Ocimum lamiifolium</i> L. (Damakessie)                     | Unavailable   | 40                      | 12.5                    |
| <i>Carica papaya</i> L. (Papaya)                              | Caution       | 35                      | 11.0                    |
| <i>Zingiber officinale</i> Roscoe. (Zingibil)                 | Safe          | 29                      | 9.1                     |
| <i>Allium sativum</i> L. (Nech shrinkrut)                     | Safe          | 28                      | 8.8                     |
| <i>Trigonella foenum-graecum</i> L. (Abish)                   | Harmful       | 24                      | 7.5                     |
| <i>Nigella sativa</i> L. (Tikur Azmud)                        | Unavailable   | 21                      | 6.4                     |
| <i>Ruta chalepensis</i> L. (Tenadam)                          | Harmful       | 15                      | 4.7                     |
| <i>Eucalyptus globulus</i> Labill. (Nech-bier zaf)            | Safe          | 13                      | 4.1                     |
| <i>Cinnamomum verum</i> J.Presl (Qarafa)                      | Harmful       | 4                       | 1.3                     |
| <i>Taverniera abyssinica</i> A. Rich. (Dingetegna)            | Unavailable   | 3                       | 0.9                     |
| <i>Artemisia abyssinica</i> Sch.Bip. ex A.Rich. (Chikugn)     | Harmful       | 3                       | 0.9                     |
| <i>Croton macrostachyus</i> Hochst. (Bisena/Misana)           | Harmful       | 3                       | 0.9                     |
| <i>Echinops kebericho</i> Mesfin (Kebericho)                  | Harmful       | 3                       | 0.9                     |
| <i>Hagenia abyssinica</i> (Bruce ex Steud.) J.F.Gmel. (Kosso) | Harmful       | 2                       | 0.6                     |
| <i>Vernonia amygdalina</i> Del. (Grawa)                       | Unavailable   | 2                       | 0.6                     |
| <i>Saccharum officinarum</i> L. (Sugar cane)                  | Safe          | 2                       | 0.6                     |
| <i>Brassica nigra</i> (L.) K.Koch (Senafitch)                 | Unavailable   | 1                       | 0.3                     |
| <i>Zehneria scabra</i> Sond. (Areg Riesa)                     | Unavailable   | 1                       | 0.3                     |
| <i>Artemisia afra</i> Jacq. ex Willd. (Ariti)                 | Harmful       | 1                       | 0.3                     |
| <i>Lepidium sativum</i> L. (feto)                             | Unavailable   | 1                       | 0.3                     |
| <i>Guizotia abyssinica</i> (L.f.) Cass. (Nug)                 | Unavailable   | 1                       | 0.3                     |
| <i>Vicia faba</i> L. (faba Beans)                             | Unavailable   | 1                       | 0.3                     |
| <i>Ananas comosus</i> (L.) Merr. (Annanas)                    | Caution       | 1                       | 0.3                     |
| <i>Phoenix dactylifera</i> L. (Temir)                         | Safe          | 1                       | 0.3                     |
| <i>Pycnostachys abyssinica</i> Fresen. (Yeroo)                | Unavailable   | 1                       | 0.3                     |
| Bahuu/B'auu (Oromiffa language name)                          | Unavailable   | 1                       | 0.3                     |

\***Safe:** safe to use in pregnancy; **Caution:** requires cautious to use in pregnancy; **Unavailable;** information on safety to use in pregnancy was not available in the current literature;

**Harmful:** potentially harmful to use in pregnancy [Contraindicated]; <sup>#</sup>Total percentage may exceed 100% due to multiple responses
