# Supplementary material for: Medicinal plants used among pregnant women in a tertiary teaching hospital in Jimma, Ethiopia: a cross-sectional study
Source: PubMed Central journal article supplement — BMJ Open. 2021 Aug 23;11(8):e046495. doi: 10.1136/bmjopen-2020-046495 (PMC8386214; doi:10.1136/bmjopen-2020-046495), 2021-08-23
Supplement: bmjopen-2020-046495supp005.pdf [file bmjopen-2020-046495supp005.pdf]

Supplementary table 4: Overview of the utilization pattern of the most frequently used medicinal plants during pregnancy at JUMC, Ethiopia

| Utilization properties (No. of citations) *               |                                     |                                                 |                          |                                                                                                                                               |                                    |                                                                  |                                                                              |                                                                                                |                                                           |
|-----------------------------------------------------------|-------------------------------------|-------------------------------------------------|--------------------------|-----------------------------------------------------------------------------------------------------------------------------------------------|------------------------------------|------------------------------------------------------------------|------------------------------------------------------------------------------|------------------------------------------------------------------------------------------------|-----------------------------------------------------------|
| Scientific name, English name, Number of users, (n = 319) | Part of plant                       | Plant condition                                 | Solvent                  | Excipients and reason for addition**                                                                                                          | Routes of administration           | Dose and measure of formulation                                  | Frequency***                                                                 | Duration of treatment***                                                                       | Number of occasions of use in pregnancy****               |
| <i>L. usitatissimum</i> (Flaxseed) (N=246)                | Seed (244)                          | Dried (234)<br>Fresh or dried (10)<br>Fresh (2) | Water (192)<br>Soup (53) | Sugar (86), sweetener<br>Salt (6), flavourant<br>Butter (2), flavourant<br>Yogurt (1), flavourant<br>Sugar or Salt (1), sweetener/flavourant/ | Oral (245)<br>Topical (1)          | 1 WGJC (176)<br>1 CC (38)<br>ANSA (7)<br>2 WGJC (7)<br>1 TSP (4) | Once (151)<br>Twice (60)<br>Every time (20)<br>Trice (9)<br>1 to 2 times (3) | During labour (92)<br>Every time (40)<br>Two months (39)<br>Three months (19)<br>Two days (17) | Once (138)<br>Twice (44)<br>Many times (38)<br>Trice (19) |
| <i>O. lamifolium</i> (No common English name) (N=40)      | Leaf (39)                           | Fresh (30)<br>Fresh or dried (8)                | Water (27)<br>NSD (8)    | -                                                                                                                                             | Oral (18)<br>Nasal/Inhalation (13) | ANSA (13)<br>1 CC (11)<br>1 to 2 CC (4)                          | Once (19)<br>Every time (16)                                                 | Every time (22)<br>One day (8)                                                                 | Many times (17)<br>Once (16)                              |
| <i>C. papaya</i> (Papaya) (N=35)                          | Fruit (32)<br>Stem or Root Bark (2) | Fresh (32)<br>Fresh or dried (2)                | Water (6)<br>NSD (29)    | Sugar (8), sweetener<br>Annans (1), for better effect                                                                                         | Oral (35)                          | 1 WGJC (22)<br>ANSA (9)                                          | Once (24)<br>Twice (5)<br>Every time (3)                                     | During labour (17)<br>Two months (6)<br>Every time (5)                                         | Once (22)<br>Many times (8)                               |
| <i>Z. officinale</i> (Ginger) (N=29)                      | Root or tuber (27)                  | Fresh or dried (14)<br>Dried (9)<br>Fresh (6)   | Water (17)<br>Tea (6)    | Garlic (1), for better effect                                                                                                                 | Oral (27)<br>Nasal/Inhalation (2)  | 1 CC (11)<br>ANSA (7)<br>1 WGJC (4)                              | Once (11)<br>Every time (9)<br>Twice (5)                                     | Every time (19)<br>One day (5)                                                                 | Many times (21)<br>Once (4)                               |
| <i>A. sativum</i> (Garlic) (N=28)                         | Root or tuber (28)                  | Fresh or dried (16)<br>Dried (7)<br>Fresh (5)   | Water (14)<br>NSD (7)    | Honey (2), sweetener<br>Ginger (1), for better effect                                                                                         | Oral (27)                          | ANSA (9)<br>1 CC (5)<br>1 head of garlic (3)                     | Every time (11)<br>Once (9)<br>Twice (5)                                     | Every time (18)<br>One day (3)                                                                 | Many times (22)                                           |
| <i>T. foenum-graecum</i> (Fenugreek) (N=24)               | Seed (21)                           | Dried (22)                                      | Water (19)<br>Soup (5)   | Sugar (2), sweetener                                                                                                                          | Oral (23)                          | 1 WGJC (16)<br>1 CC (5)<br>ANSA (2)                              | Once (13)<br>Twice (8)<br>Every time (3)                                     | During labour (14)<br>3 months (4)<br>Every time (3)                                           | Once (19)<br>Many times (4)                               |
| <i>N. sativa</i> (Black seed) (N=21)                      | Oil (11)<br>Seed (9)                | Oil (11)<br>Dried (7)                           | Water (7)<br>NSD (8)     | Cheese (1), flavourant                                                                                                                        | Oral (16)                          | ANSA (4)<br>1 TSP (3)                                            | Every time (10)<br>Once (6)                                                  | Every time (17)<br>One day (3)                                                                 | Many times (13)                                           |
| <i>R. chalepensis</i> (Fringed rue) (N=15)                | Leaf (15)                           | Fresh (12)<br>Fresh or dried (3)                | Water (11)<br>Coffee (4) | Garlic (1), for better effect                                                                                                                 | Oral (15)                          | 1 WGJC (6)<br>1 CC (4)<br>ANSA (4)                               | Once (9)<br>Every time (5)                                                   | Every time (10)<br>Two days (2)                                                                | Many times (9)<br>Once (4)                                |
| <i>E. globulus</i> ("Eucalyptus"/blue gum) (N=13)         | Leaf (12)                           | Fresh (12)                                      | Water (11)               | <i>O. lamifolium</i> and <i>Leucas martinicensis</i> (Jacq.) R.Br. (1), for better effect<br><i>O. lamifolium</i> (1), for better effect      | Nasal/Inhalation (10)              | ANSA (12)                                                        | Every time (9)<br>Once (4)                                                   | Every time (7)<br>One day (5)                                                                  | Many times (9)<br>Once (3)                                |

**Abbreviations:** WGJC: water glass/water jug cup ( $\approx$ 250mL), 1WGJC: One water glass/water jug cup, CC: Coffee cup, ANSA: take as 'needed in safe amount' using any appropriate measuring device for the appropriate duration the woman believes, SSp: Soup Spoon, NSD: No solvent needed, TSP: Teaspoon full. \*Numbers may not add up due to missing values. \*\*For better effect: Added to produce either synergistic or additive effect. \*\*\*Every time: a duration or frequency of treatment whereby the pregnant woman takes the MP for many frequencies per day that she believes is appropriate for a period of time until she feels cured. \*\*\*\*use for a given duration is taken as one occasion, for example use of the medicinal plant for a week, one month, two months, three months or more duration is taken as one occasion. On the other hand, if a woman uses for 2 weeks in the first month of pregnancy, and in the 2<sup>nd</sup>, 3<sup>rd</sup>, 4<sup>th</sup> and 5<sup>th</sup> months of pregnancy, each for one-week duration then the number of occasions will be five.
